# Supplementary material for: PRDM16 binds MED1 and controls chromatin architecture to determine a brown fat transcriptional program
Source: PubMed Central journal article supplement — Genes Dev. 2015 Feb 1;29(3):298–307. doi: 10.1101/gad.252734.114 (PMC4318146; doi:10.1101/gad.252734.114), 2015-02-01
Supplement: supp_29.3.298_SuppFigs_Table.pdf [file supp_29.3.298_SuppFigs_Table.pdf]

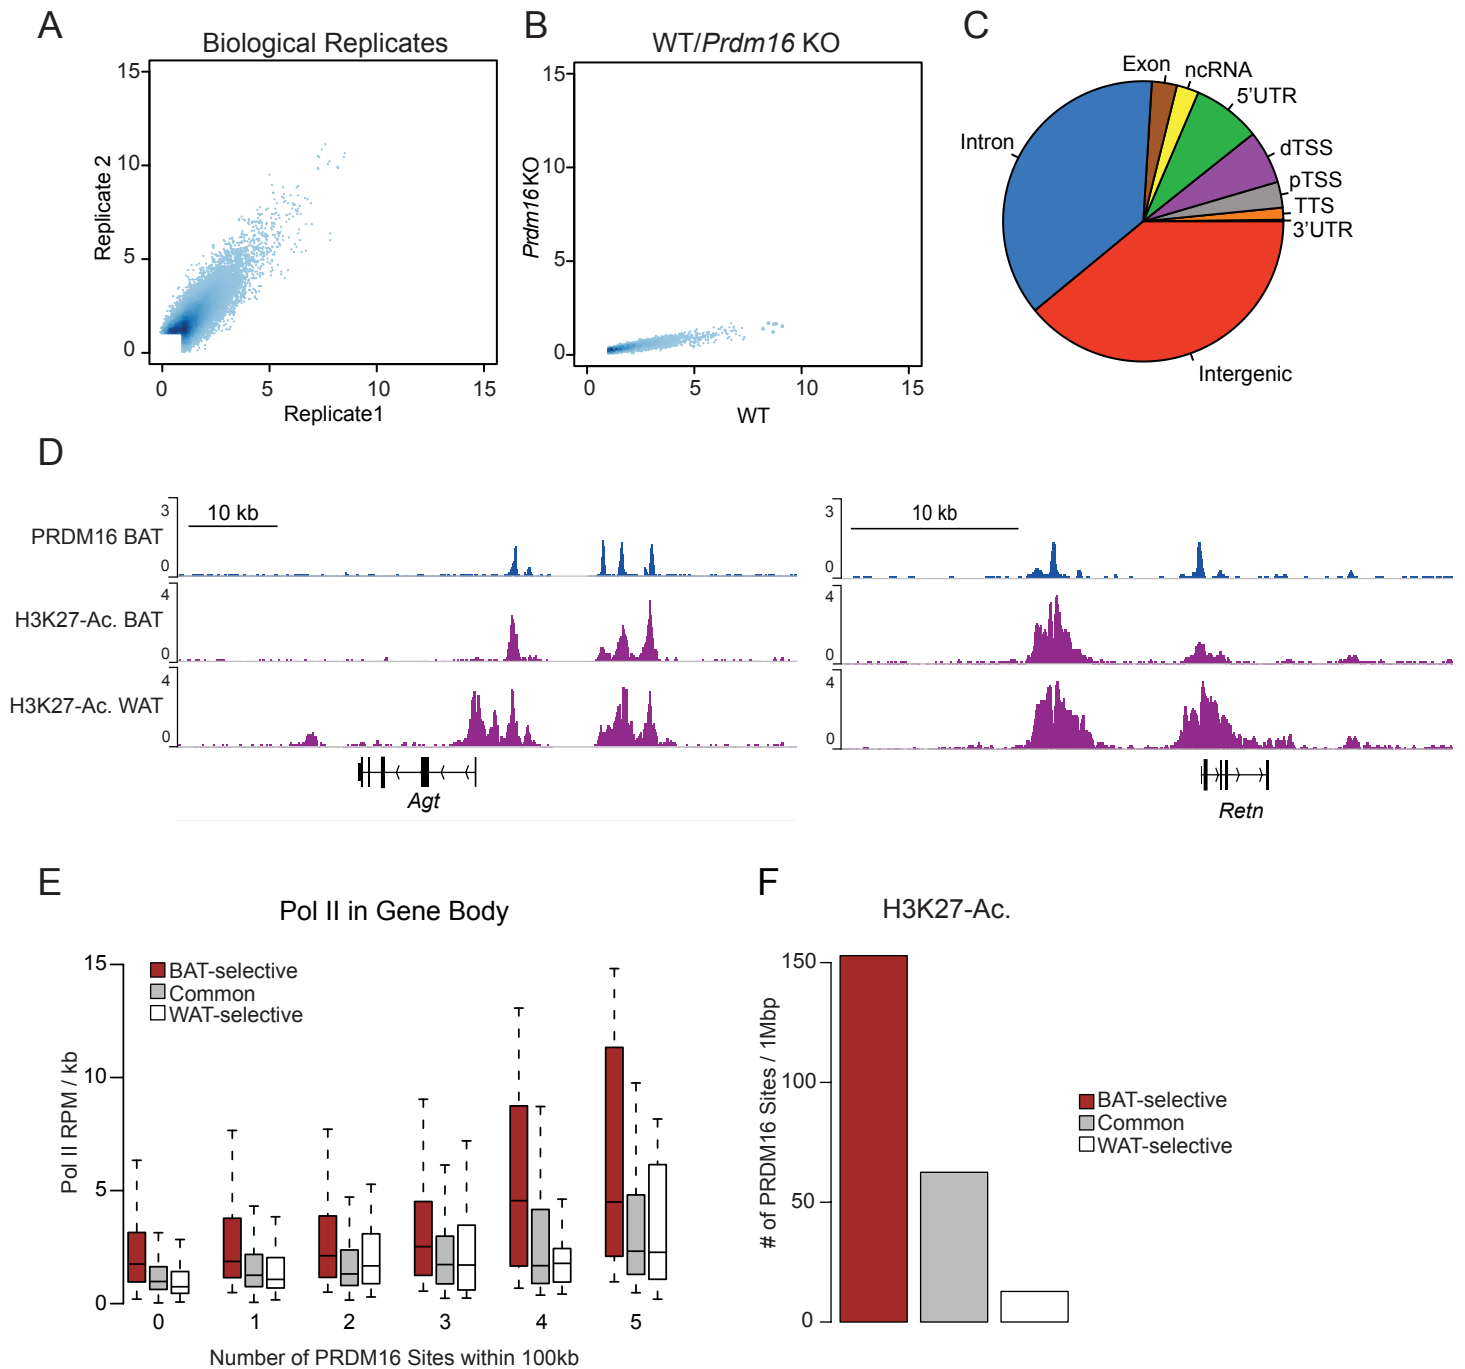

**Figure S1. PRDM16 is preferentially bound to BAT-selective genes in BAT**

- (A) Scatter plot comparing ChIP-seq binding profiles of PRDM16 from independent biological replicates of BAT
- (B) Scatter plot showing PRDM16 ChIP-seq signal in wildtype (WT) and *Prdm16* KO BAT using pooled replicates.
- (C) Pie chart showing the relative enrichment of PRDM16 in different genomic regions
- (D) ChIP-seq stack-height profiles in reads per million (RPM) for PRDM16 in BAT and H3K27-Ac. in BAT and WAT at the *Agt* and *Retn* loci.
- (E) Box plot comparing Pol II (RPM/kb) levels within gene bodies of BAT-selective, common and WAT-selective genes with varying number of proximal PRDM16 binding sites
- (F) Average number of PRDM16 binding sites (per 1Mbp) at BAT-selective, common and WAT-selective regions of H3K27-Ac. enrichment

A

PRDM16 - activated genes

| De Novo Motif | TF       | P-Value            | Hit % |
|---------------|----------|--------------------|-------|
|               | EBF      | 10 <sup>-118</sup> | 55.6  |
|               | C/EBP    | 10 <sup>-57</sup>  | 30.4  |
|               | NF1-half | 10 <sup>-41</sup>  | 49.3  |
|               | DR1-half | 10 <sup>-31</sup>  | 21.7  |

PRDM16 - repressed genes

| De Novo Motif | TF       | P-Value           | Hit % |
|---------------|----------|-------------------|-------|
|               | C/EBP    | 10 <sup>-97</sup> | 43.5  |
|               | EBF      | 10 <sup>-71</sup> | 47.5  |
|               | NF1-half | 10 <sup>-44</sup> | 61.3  |
|               | DR1      | 10 <sup>-17</sup> | 4.2   |

B

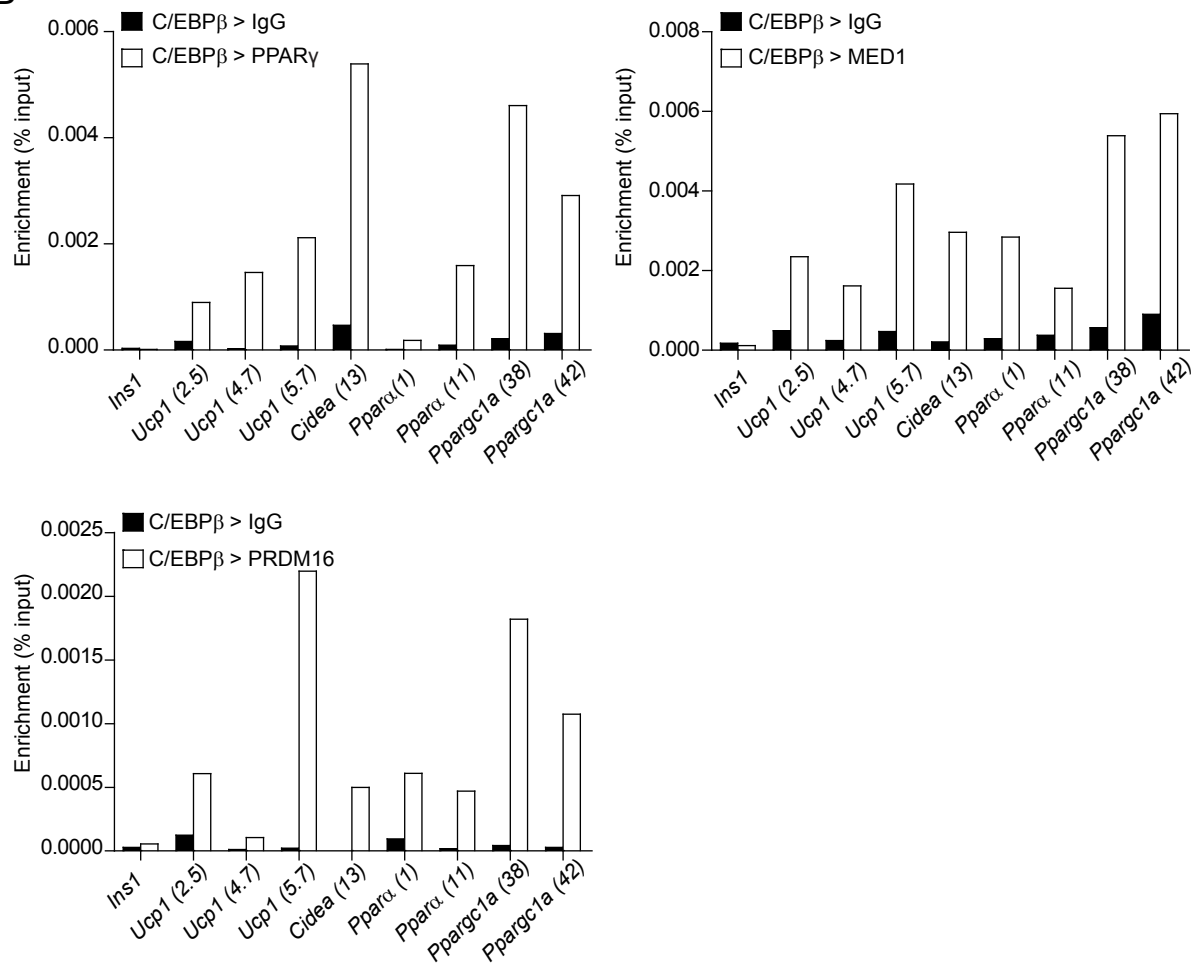

Figure S2. C/EBPβ, PPARγ, PRDM16 and MED1 are co-localized at BAT-selective loci

(A) *De novo* motif analysis at regions of PRDM16 enrichment within 100kb of genes positively or negatively regulated by PRDM16  
 (B) Sequential ChIP analysis. Chromatin was first immunoprecipitated using an anti-C/EBPβ antibody. Sequential immunoprecipitation was performed comparing IgG to PPARγ, MED1 and PRDM16. Experiments were performed a minimum of 3 times and representative data is shown.

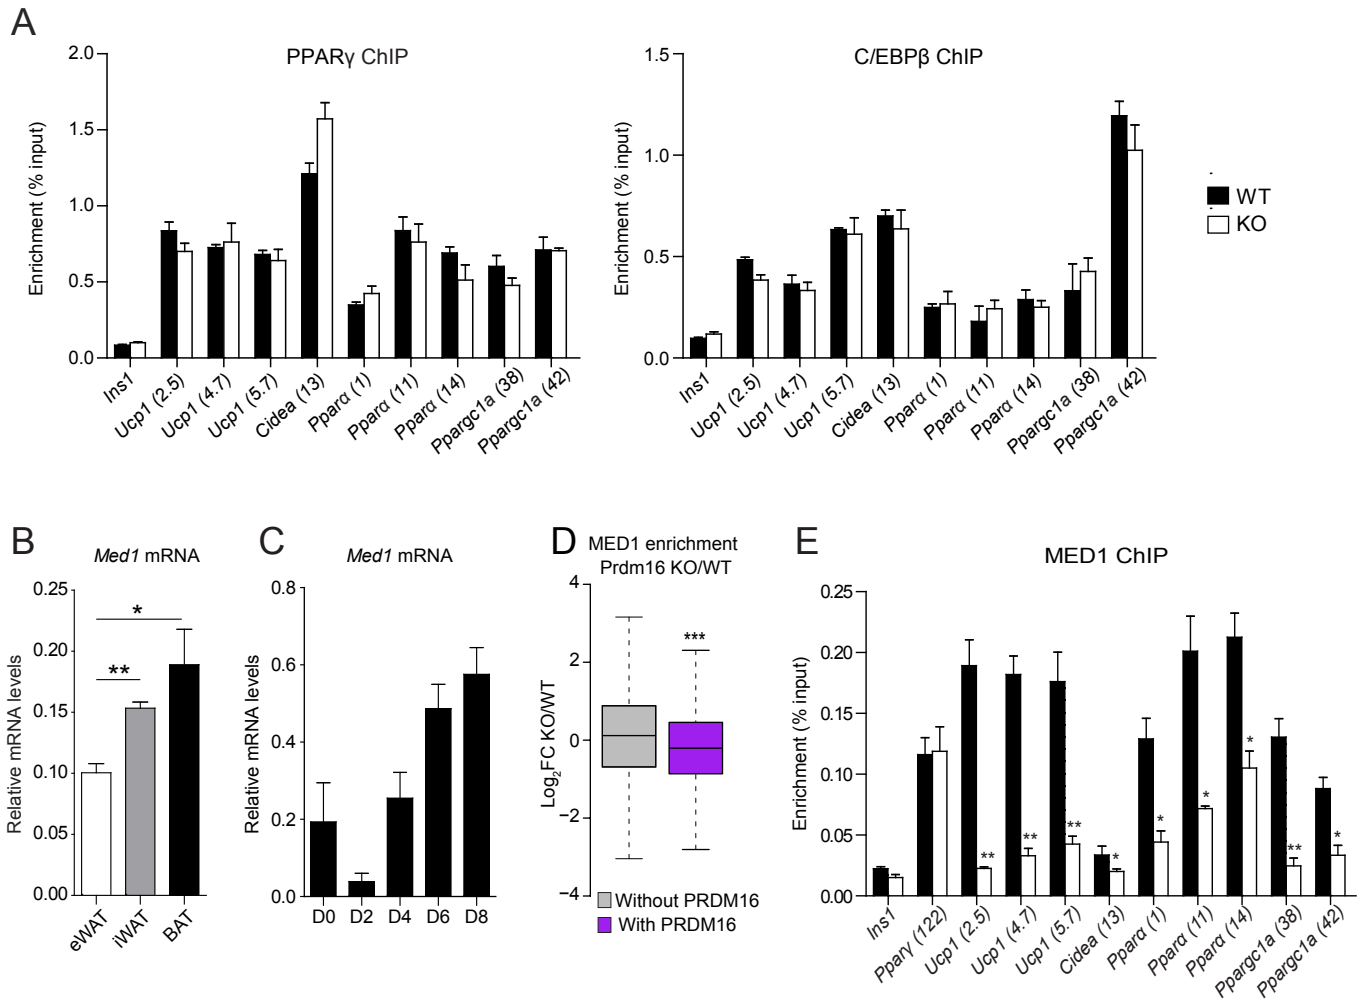

**Figure S3. Loss of PRDM16 does not affect PPAR $\gamma$  or C/EBP $\beta$  binding levels at BAT-selective genes**

**(A)** ChIP-qPCR analysis of PPAR $\gamma$  and C/EBP $\beta$  binding at BAT-selective genes in WT and *Prdm16* KO BAT (mean  $\pm$  SEM; n = 3; \*p < 0.05)

**(B)** Relative Med1 mRNA levels in epididymal WAT, inguinal WAT and BAT (mean  $\pm$  SEM; n = 3; \*p < 0.05; \*\*p < 0.01)

**(C)** Relative Med1 mRNA levels in differentiating brown adipocytes (mean  $\pm$  SEM; n = 3)

**(D)** Box plot comparing MED1 occupancy changes upon *Prdm16* KO in BAT at sites that possess or lack PRDM16 binding (\*\*\*) p < 10<sup>-10</sup>)

**(E)** ChIP-qPCR analysis of MED1 levels at BAT-selective genes in WT and *Prdm16* KO BAT (mean  $\pm$  SEM; n = 3; \*p < 0.05, \*\*p < 0.01)

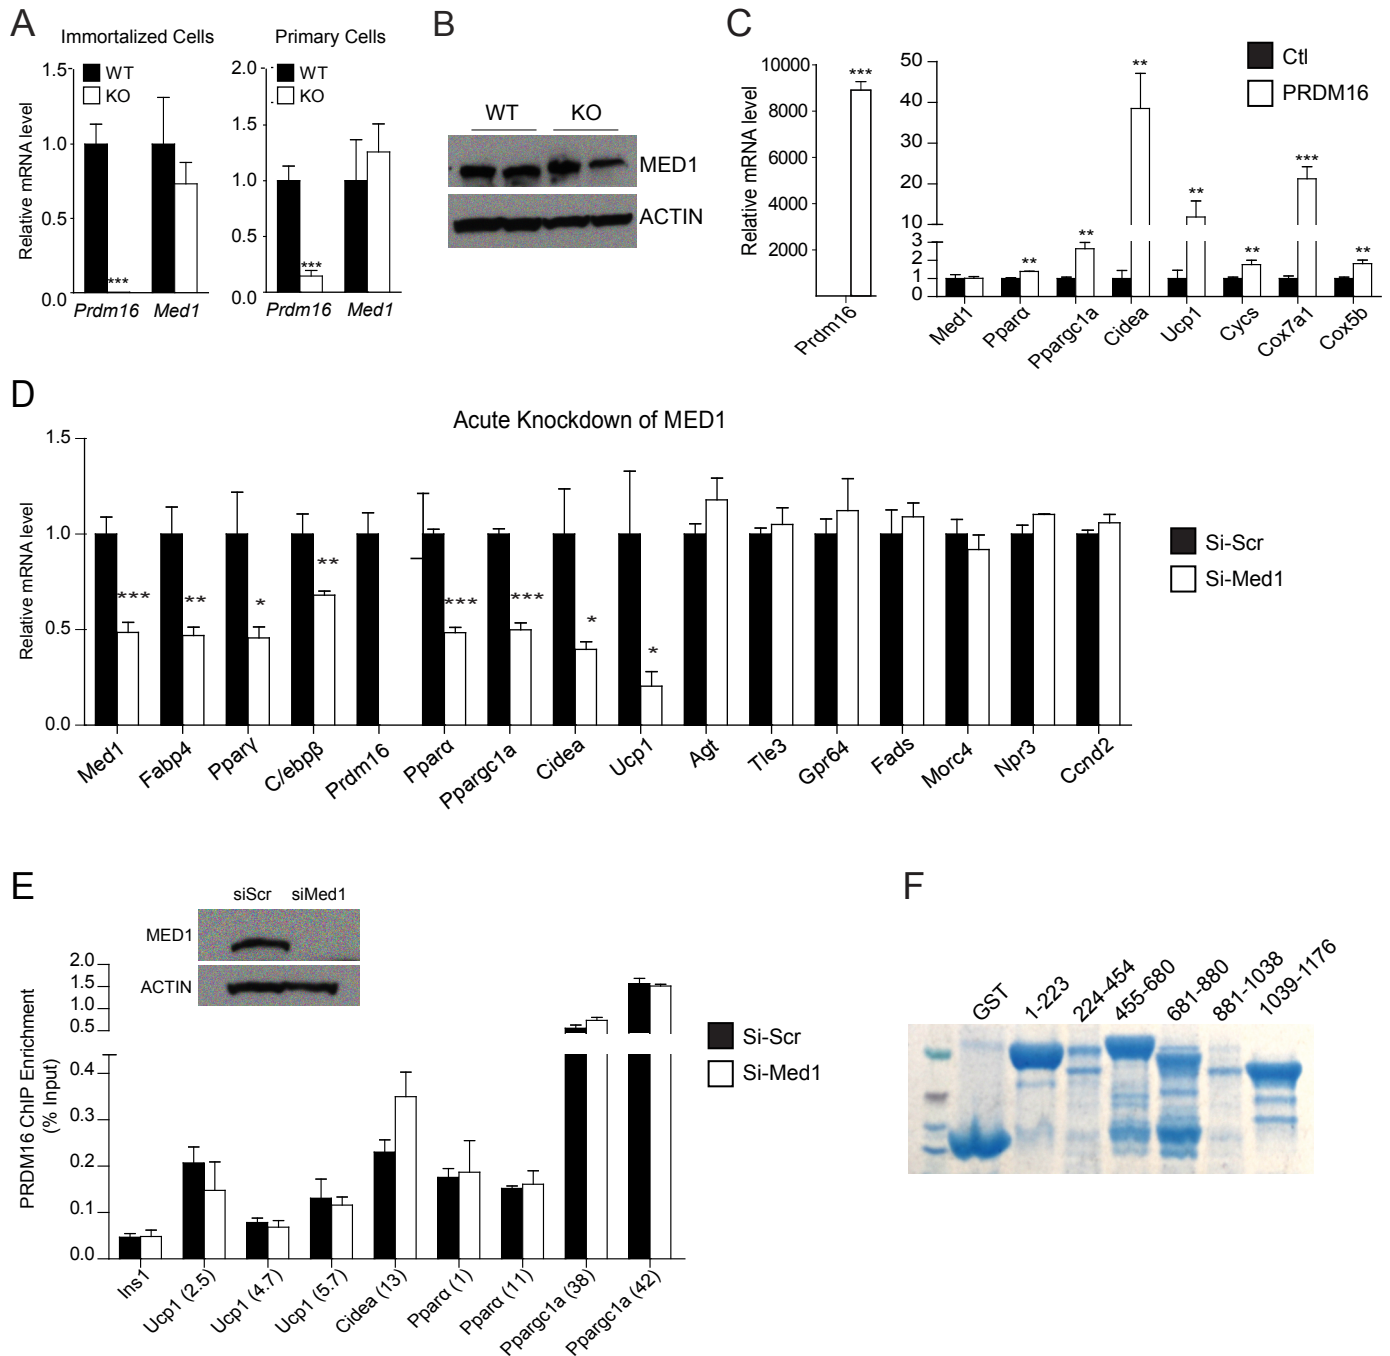

**Figure S4. PRDM3 binds and recruits MED1 to BAT-selective loci**

(A) Relative mRNA expression levels of *Prdm16* and *Med1* in immortalized brown adipocytes, primary brown adipocytes, and *Prdm16*-deficient brown adipocytes that have been transduced with *Prdm16* (mean  $\pm$  stdev; n = 3; \*\*\*p<0.001)

(B) MED1 protein levels from WT and *Prdm16* KO adipocytes

(C) Relative mRNA levels of BAT-sel. genes in PRDM16-deficient brown adipocytes that were transduced with control or PRDM16-expressing virus. (mean  $\pm$  Stdev; n = 3; \*p < 0.05, \*\*p<0.01, \*\*\*p<0.001)

(D) Relative mRNA levels of BAT-selective, common and WAT-selective genes from differentiated primary brown adipocytes that were transfected with siScr or siMed1. (mean  $\pm$  Stdev; n = 3; \*p < 0.05, \*\*p<0.01, \*\*\*p<0.001)

(E) ChIP-qPCR analysis of PRDM16 enrichment after acute MED1 deletion at BAT-sel. genes (mean  $\pm$  Stdev; n = 3).

Inset - Western blot analysis of MED1 levels after acute MED1 deletion

(F) Coomassie blue staining of GST and GST-PRDM16 fusion proteins

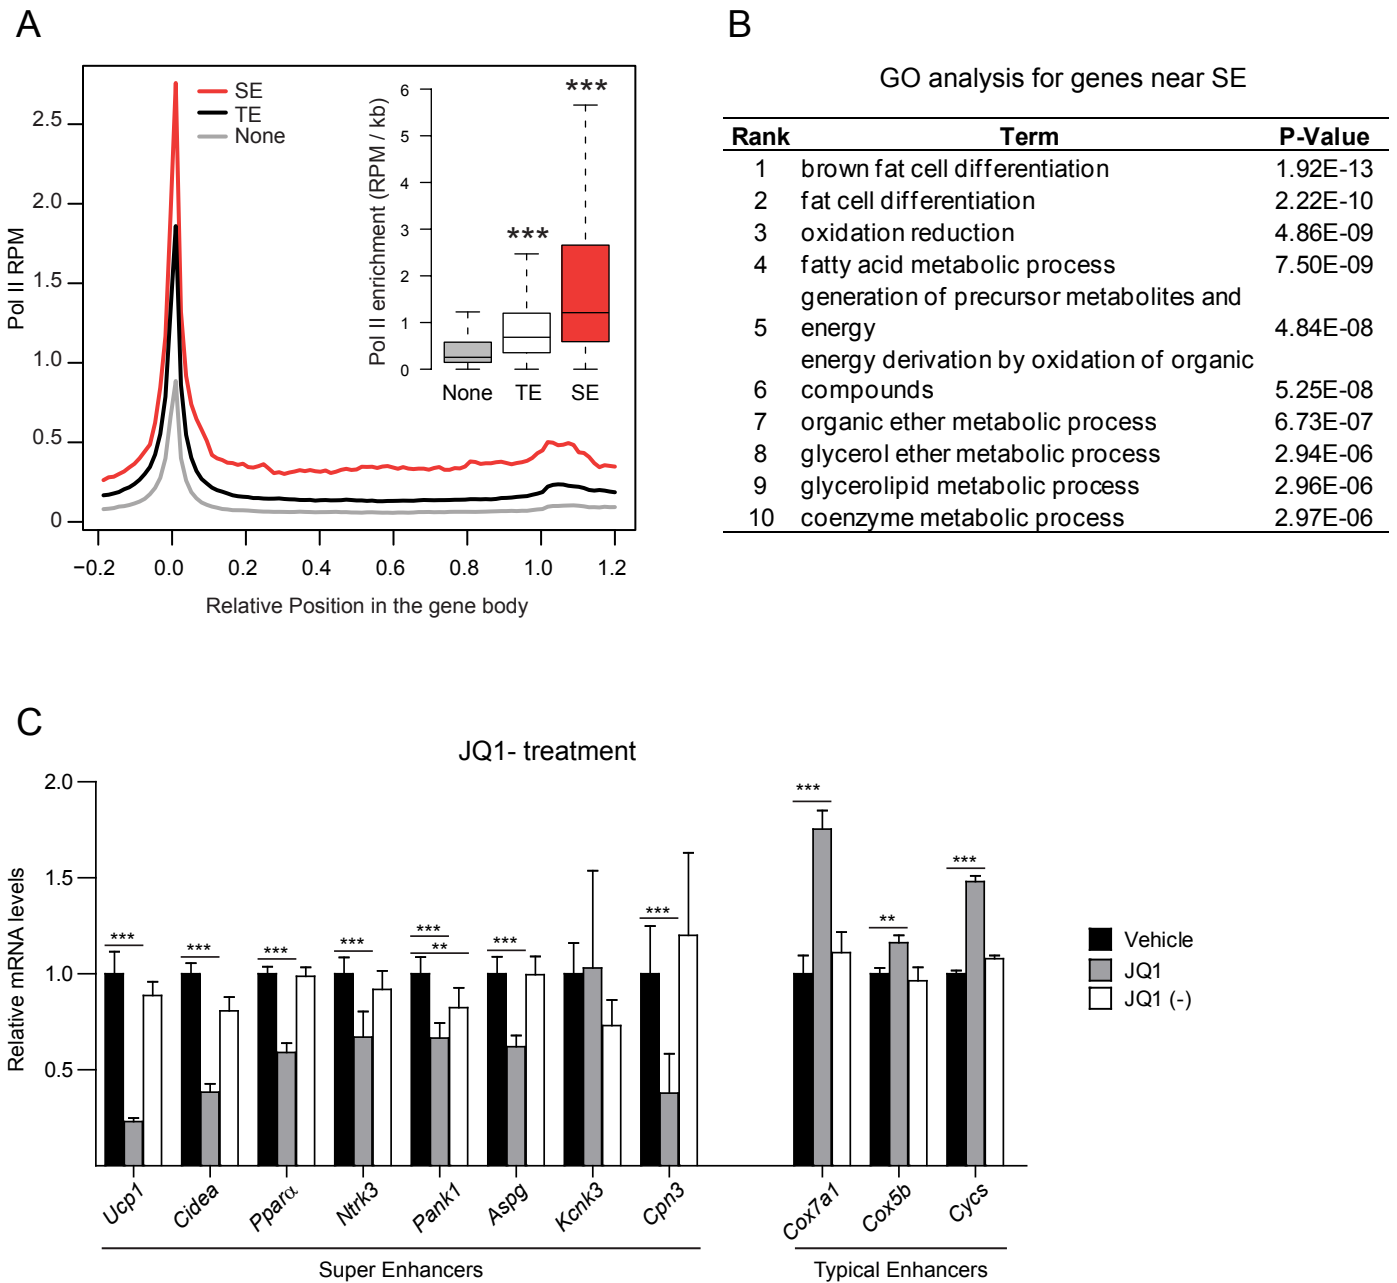

**Figure S5. PRDM16 regulates Super Enhancers in BAT**

**(A)** Average Pol II profile (RPM) around gene bodies of genes associated with super enhancers (red), typical enhancers (black), or genes without proximal MED1 occupancy (grey). Insert – box plot representation of Pol II signal (RPM/kb) of same data (\*\* $p < 10^{-50}$ )

**(B)** DAVID gene ontology (GO) analysis for super enhancer-associated genes in WT BAT

**(C)** Relative mRNA levels of genes marked by SE or TE in differentiated primary brown adipocytes that were treated with either vehicle, JQ1 or an inert JQ1 analog (JQ1(-)) (mean  $\pm$  Stdev;  $n = 6$ ; \* $p < 0.05$ , \*\* $p < 0.01$ , \*\*\* $p < 0.001$ )

Table S1

## Primers used for real-time qPCR and ChIP-qPCR analysis

| mRNA                 | Fwd                     | Rev                       |
|----------------------|-------------------------|---------------------------|
| <i>Agt</i>           | AAGACCCTGCATGATCAGCTC   | CTTCCTGCCTCATTTCAGCATC    |
| <i>Aspg</i>          | ATTGCCTTCAGG GGCTGTGAC  | CTGGCCCAGCACATAGGACAGT    |
| <i>C/ebpβ</i>        | ACGACTTCCTCTCCGACCTCT   | CGAGGCTCACGTAACCGTAGT     |
| <i>Ccnd2</i>         | AGCTGTCCCTGATCCGCAAGC   | AAGCCCACAGATGGCTGCTCC     |
| <i>Cidea</i>         | TGCTCTTCTGTATCGCCAGT    | GCCGTGTTAAGGAATCTGCTG     |
| <i>Cox5b</i>         | GCTGCATCTGTGAAGAGGACAAC | CAGCTTGTAAATGGGTTCCACAGT  |
| <i>Cox7a1</i>        | CAGCGTCATGGTCAGTCTGT    | AGAAAACCGTGTGGCAGAGA      |
| <i>Cpn3</i>          | GCCGACATCCCTCCGGACATC   | TCCAGGTGACGGACCTGAGTGT    |
| <i>Cycs</i>          | GCAAGCATAAGACTGGACCAAA  | TTGTTGGCATCTGTGAAGAGAATC  |
| <i>Fabp4</i>         | ACACCGAGATTTCTTCAAAGT   | CCATCTAGGGTTATGATGCTCTTCA |
| <i>Fads</i>          | TGCGCAAGTTCTGAAACCCCT   | CATGTCTTCAGCTGCCTGGCG     |
| <i>Gpr64</i>         | CCACACCAGCCCCATCTGTCC   | TCCATCTGGGATACTTGGGCTTCC  |
| <i>Kcnk3</i>         | GCTTCGCCG GCTCCTTCTACTT | CTAGTGTGAGCGGGATGCCAG     |
| <i>Med1</i>          | TGCTTGAAAATTCTCAAAA     | GATGTCAAAGTGGCTCACCA      |
| <i>Morc4</i>         | GTATCCAGGCGCAGGCGGTTA   | AGATGGCTTCTAGGCTGGGCA     |
| <i>Npr3</i>          | GTGCGCTACATCCAAGGCAGC   | TCCACTGGTCATGCCGTGTCTG    |
| <i>Ntrk3</i>         | ATGCGAGCCCTACACCTCTTA   | GACTGCTATGGACACCCCAAA     |
| <i>Pank1</i>         | CGCTGTTGCGCCAGCATGATTC  | CAGCTTAACCAGGGTTCCACCGA   |
| <i>Ppargc1a</i>      | CCCTGCCATTGTTAAGACC     | TGCTGCTGTTCTGTTTTT        |
| <i>Ppara</i>         | GCGTACGGCAATGGCTTTAT    | GAACGGCTTCTCAGGTTCTT      |
| <i>Pparγ2</i>        | TGGCATCTCTGTGTCAACCATG  | GCATGGTGCCTTCGCTGA        |
| <i>Prdm16</i>        | CAGCACGGTGAAGCCATTC     | GCGTGCATCCGCTTGTG         |
| <i>Tbp</i>           | GAAGCTGCGGTACAATTCCAG   | CCCCTGTACCCTTACCAAT       |
| <i>Tle3</i>          | CTCACCCACACCCCGCATCAA   | AAACCGCAATGTTCCCGTCGC     |
| <i>Ucp1</i>          | ACTGCCACACCTCCAGTCATT   | CTTTGCCTCACTCAGGATTGG     |
| ChIP                 | Fwd                     | Rev                       |
| <i>18s</i>           | AGTCCCTGCCCTTTGTACACA   | CGATCCGAGGGCCTCACT        |
| <i>Cidea (13)</i>    | GGCCACTTGAGGAGCCAACCA   | TGGGCACTGGCCTTGTAGCTG     |
| <i>Fabp4</i>         | GACAAAGGCAGAAATGCACA    | AATGTCAGGCATCTGGGAAC      |
| <i>Ins1</i>          | GGACCCACAAGTGAACAAC     | GTGCAGCACTGATCCACAAT      |
| <i>Ppargc1a (38)</i> | TCCGAGTTTCCCTGCTGTGGC   | AGGGACTTGCACTGTGGTGG      |
| <i>Ppargc1a (42)</i> | GAGGTGGCACCAGGACACCAG   | CCCAAGCTCGAGACTCCGCTC     |
| <i>Ppara (1)</i>     | GGGGCATGTGCATTCCGTGAC   | CACTGGGGCTCTGCCAACTGA     |
| <i>Ppara (11)</i>    | AAGAGCATGGGACAGTGGCCG   | TGGCCAGCTGAAGGTCACCAC     |
| <i>Ppara (14)</i>    | CCTGCCCATAGGCAGTATGGTC  | ACAGGGGCAGAAGCCAAGCTG     |
| <i>Pparγ (122)</i>   | AGCTTTGCTGGCTAGAGGTG    | TTTCGCAGAAGTGTGAGTTGA     |
| <i>Ucp1 (2.5)</i>    | CAAATGGTGACCGGGTGCCTT   | GGGTGACTGACCTCTGTGACG     |
| <i>Ucp1 (4.7)</i>    | CCCCACTGCCTGTACGTTCA    | GAAGCTGCCGAATGGTGCCTC     |
| <i>Ucp1 (5.7)</i>    | ACCACACCATTTGGAGCCTGAC  | TGAGTTTGCAGGGAGGATGGGC    |
